# Supplementary material for: DPIE [2-(1,2-diphenyl-1H-indol-3-yl)ethanamine] Augments Pro-Inflammatory Cytokine Production in IL-1β-Stimulated Primary Human Oral Cells
Source: MDPI journal article supplement (doi:10.3390/ijms19071835), 2018-06-22
Supplement: s1 [file s1]

**Supplementary Figure A1.**

The effects of DPIE on iNOS and TNF- $\alpha$  expression in IL-1 $\beta$ -stimulated hGFs. hGFs were treated for 12 h with 0, 2, 4, or 8  $\mu$ M DPIE in the absence or presence of 10 ng/ml IL-1 $\beta$ . (A, B) The effects of DPIE on iNOS and TNF- $\alpha$  mRNA production in IL-1 $\beta$ -stimulated hGFs. (C, D) The effect of DPIE alone on iNOS and TNF- $\alpha$  mRNA production in hGFs.

**Supplementary Figure A2.**

Effects of DPIE on the viability of unstimulated and interleukin (IL)-1 $\beta$ -stimulated hGFs. hGFs were incubated for 12 h without (control) or with 10 ng/ml IL-1 $\beta$  in the presence of the indicated concentrations of DPIE, and the relative viable cell number was determined using the 3-[4,5-dimethylthiazol-2-yl]-2, 5-diphenyltetrazolium bromide method. Each value represents the mean  $\pm$  SD of triplicate assays. The Student's *t*-test was used for comparing values between groups.

**Supplementary Figure A3.**

DPIE did not affect the proinflammatory cytokine expression in *F. nucleatum*-infected hGFs. hGFs were treated for 12 h with 0, 2, 4, or 8  $\mu$ M DPIE in the absence or presence of *F. nucleatum* (MOI100). (A-F) DPIE did not affect IL-6, IL-8, COX2, iNOS, and TNF- $\alpha$  mRNA production in *F. nucleatum*-infected hGFs.
